# Supplementary material
Source: MDPI journal article supplement (https://www.mdpi.com/1424-2818/15/2/129)
Supplement: s1 [file s1 › diversity-2100354-supplementary.pdf]

Table S1: Parameters used in simulations in software VORTEX (version 10.3.6.0), Chicago Zoological Society, Brookfield, Illinois, USA, 2017

|                                           |                         |
|-------------------------------------------|-------------------------|
| <b>SCENARIO SETTINGS</b>                  |                         |
| Number of iterations                      | 500                     |
| Number of years (timesteps)               | 100                     |
| Duration of each year in days             | 365                     |
| Extinction definition                     | Only one sex remains    |
| <b>SPECIES DESCRIPTION</b>                |                         |
| Lethal equivalents                        | 6.29                    |
| <b>REPRODUCTIVE SYSTEM</b>                |                         |
| Reproduction type                         | Polygynous              |
| Age of first offspring females            | 4                       |
| Maximal age of female reproduction        | 17                      |
| Age of first offspring males              | 4                       |
| Maximal age of male reproduction          | 16                      |
| Maximal lifespan                          | 22                      |
| Maximal number of broods per year         | 1                       |
| Maximal number of progeny per brood       | 1                       |
| Sex ratio at birth – in % of males        | 49                      |
| Density dependent reproduction            | does not apply          |
| <b>REPRODUCTIVE RATES</b>                 |                         |
| % adult females breeding                  | 58.43                   |
| SD                                        | 21.33                   |
| % males in breeding pool                  | 100                     |
| <b>MORTALITY RATES</b>                    |                         |
| Mortality rates of females and males as % | Table 2 (of Manuscript) |
| <b>CATASTROPHES</b>                       |                         |
| Number of types of catastrophys           | does not apply          |
| <b>POPULATION SIZE</b>                    |                         |
| Initial population size                   | 20                      |
| Carying capacity                          | 20/30/50                |
| Use stable age distribution               |                         |
